# Supplementary material for: Direct evidence of plasmon enhancement on photocatalytic hydrogen generation over Au/Pt-decorated TiO2nanofibers
Source: Royal Society of Chemistry journal article supplement (doi:10.1039/c3nr06562f), 2014-01-01
Supplement: c3nr06562f1.pdf [file c3nr06562f1.pdf]

## Supplementary Information

### Direct Evidence of Plasmon Enhancement on Photocatalytic Hydrogen Generation over Au/Pt-Decorated TiO<sub>2</sub> Nanofibers

Zhenyi Zhang,<sup>a,b</sup> Anran Li,<sup>b</sup> Shao-Wen Cao,<sup>b</sup> Michel Bosman,<sup>c</sup> Shuzhou Li,<sup>b</sup> and Can Xue<sup>\*b</sup>

<sup>a</sup> *School of Physics and Materials Engineering, Dalian Nationalities University,  
Dalian, 116600, China.*

<sup>b</sup> *Solar Fuels Laboratory, School of Materials Science and Engineering, Nanyang  
Technological University, 50 Nanyang Avenue, Singapore 639798, Singapore. Fax: +65 6790  
9081; Tel: +65 6790 6180; E-mail: [cxue@ntu.edu.sg](mailto:cxue@ntu.edu.sg)*

<sup>c</sup> *Institute of Materials Research and Engineering A\* STAR, 3 Research Link, 117602,  
Singapore.*

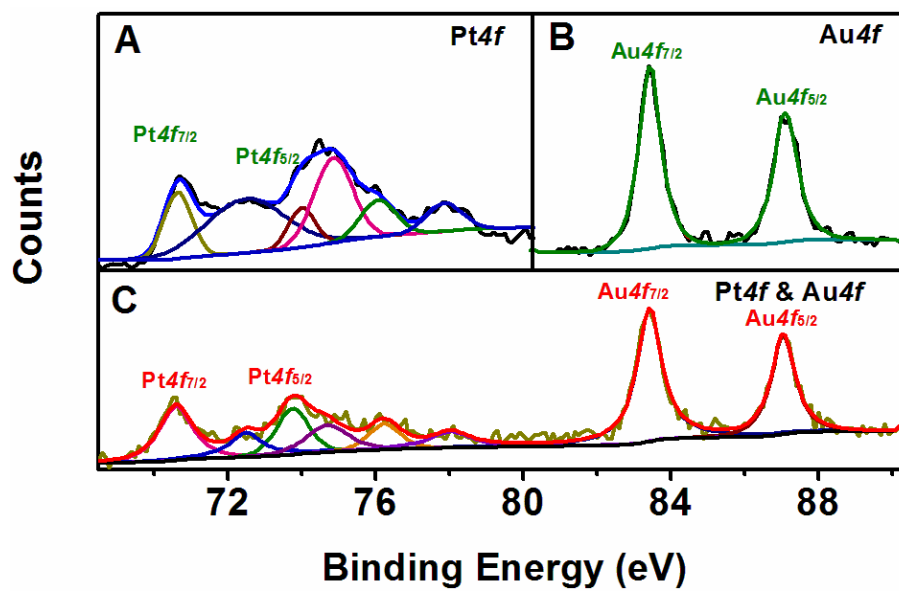

**Figure S1.** High resolution XPS spectra of Au 4f or/and Pt 4f regions for (A) Pt<sub>1</sub>/TiO<sub>2</sub> nanofibers; (B) Au<sub>1</sub>/TiO<sub>2</sub> nanofibers; (C) Au<sub>0.75</sub>/Pt<sub>0.25</sub>/TiO<sub>2</sub> nanofibers.

| <b>Elements</b>      | <b>Pt<sub>1</sub>/TiO<sub>2</sub><br/>nanofibers</b> | <b>Au<sub>1</sub>/TiO<sub>2</sub><br/>nanofibers</b> | <b>Au<sub>0.75</sub>/Pt<sub>0.25</sub>/TiO<sub>2</sub><br/>nanofibers</b> |
|----------------------|------------------------------------------------------|------------------------------------------------------|---------------------------------------------------------------------------|
| <b>Pt4f7 Pt (0)</b>  | <b>70.7 eV</b>                                       | -----                                                | <b>70.6 eV</b>                                                            |
| <b>Pt4f7 Pt (II)</b> | <b>72.5 eV</b>                                       | -----                                                | <b>72.5 eV</b>                                                            |
| <b>Pt4f7 Pt (IV)</b> | <b>74.7 eV</b>                                       | -----                                                | <b>74.7 eV</b>                                                            |
| <b>Au4f7 Au (0)</b>  | -----                                                | <b>83.4 eV</b>                                       | <b>83.4 eV</b>                                                            |

**Table S1.** Peak position of binding energy of the samples

As observed in Figure 1S, the XPS results shows that the Au species in the Au<sub>1</sub>/TiO<sub>2</sub> nanofibers are only metallic Au<sup>0</sup> state, while there are three states of Pt species in the Pt<sub>1</sub>/TiO<sub>2</sub> nanofibers, including the metallic Pt<sup>0</sup> state, Pt<sup>2+</sup> state, and Pt<sup>4+</sup> state.<sup>1,2</sup> The presence of Pt<sup>2+</sup> and Pt<sup>4+</sup> state might be attributed to the formation of Pt-O bond on the surface of Pt nanostructures, which is agreement to the literatures.<sup>3, 4</sup> By comparing the peak positions of binding energy with the Au<sub>1</sub>/TiO<sub>2</sub> and Pt<sub>1</sub>/TiO<sub>2</sub> nanofibers in table S1, the Au4f7 and Pt4f7 peaks in the Au<sub>0.75</sub>/Pt<sub>0.25</sub>/TiO<sub>2</sub> nanofibers are nearly unchanged, indicating that the Au and Pt NPs were co-decorated in the TiO<sub>2</sub> nanofibers, and no Au-Pt alloy formation.

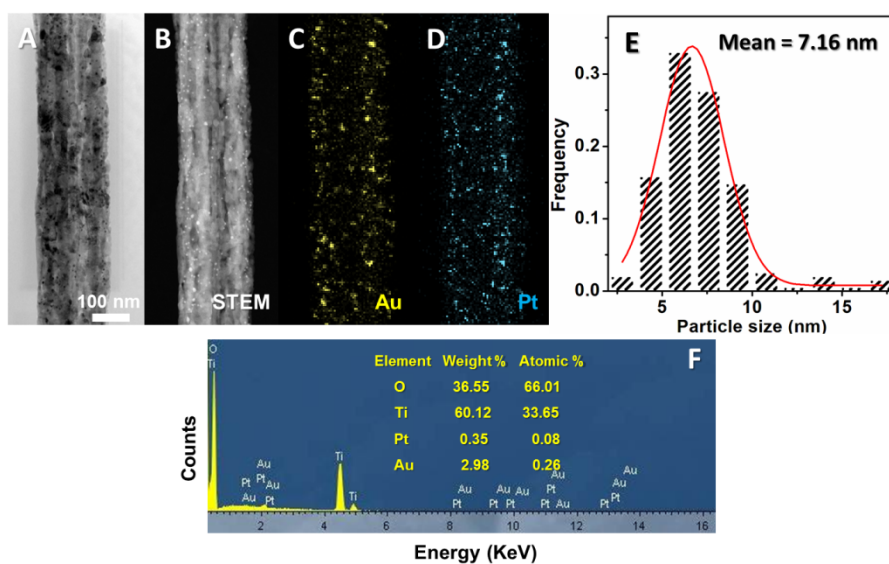

**Figure S2.** (A) TEM image and (B) dark-field STEM image of the  $\text{Au}_{0.75}/\text{Pt}_{0.25}/\text{TiO}_2$  nanofibers; Elemental mapping images from image A: (C) Au element; (D) Pt element; (E) Size distribution histogram of metal NPs in the  $\text{Au}_{0.75}/\text{Pt}_{0.25}/\text{TiO}_2$  nanofibers calculated from the above STEM image; (F) EDS spectrum of the  $\text{Au}_{0.75}/\text{Pt}_{0.25}/\text{TiO}_2$  nanofibers.

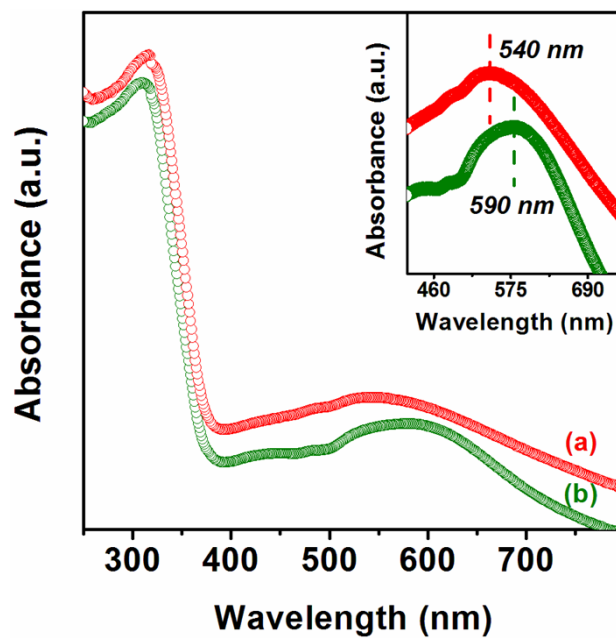

**Figure S3.** UV-Vis absorption spectra of the (a) Au<sub>0.75</sub>/Pt<sub>0.25</sub>/TiO<sub>2</sub> and (b) Au<sub>1</sub>/TiO<sub>2</sub> nanofibers, which are converted from diffuse reflectance spectra by means of the Kubelka-Munk function.

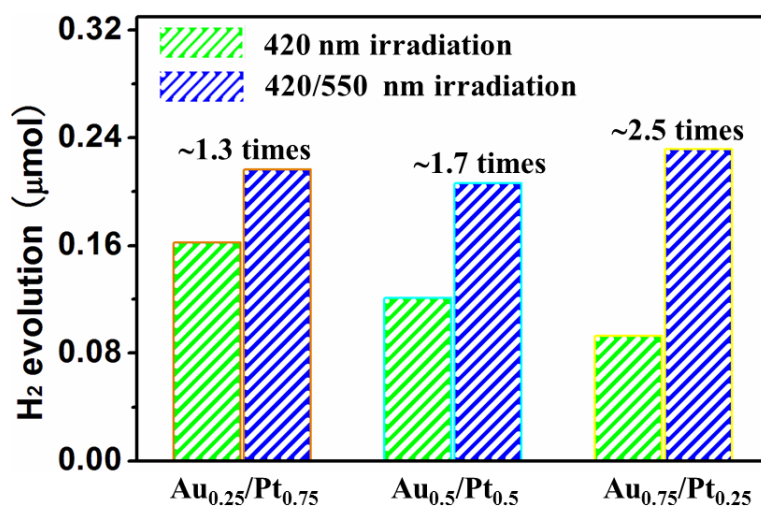

**Figure S4.** H<sub>2</sub> evolution amount for the Au/Pt/TiO<sub>2</sub> nanofibers with different mole ratios of Au to Pt versus the irradiation wavelength after 2 h irradiation by using L-ascorbic acid (H<sub>2</sub>A) as the sacrificial agents in 10 mL aqueous solution.

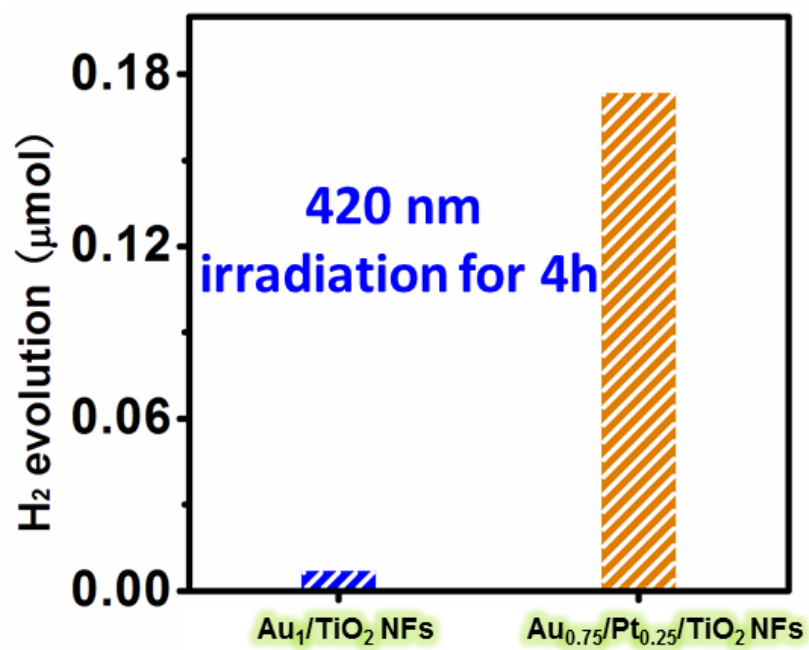

**Figure S5.** H<sub>2</sub> evolution amount of the Au<sub>1</sub>/TiO<sub>2</sub> and Au<sub>0.75</sub>/Pt<sub>0.25</sub>/TiO<sub>2</sub> nanofibers under irradiation at 420 ±10 nm for 4h.

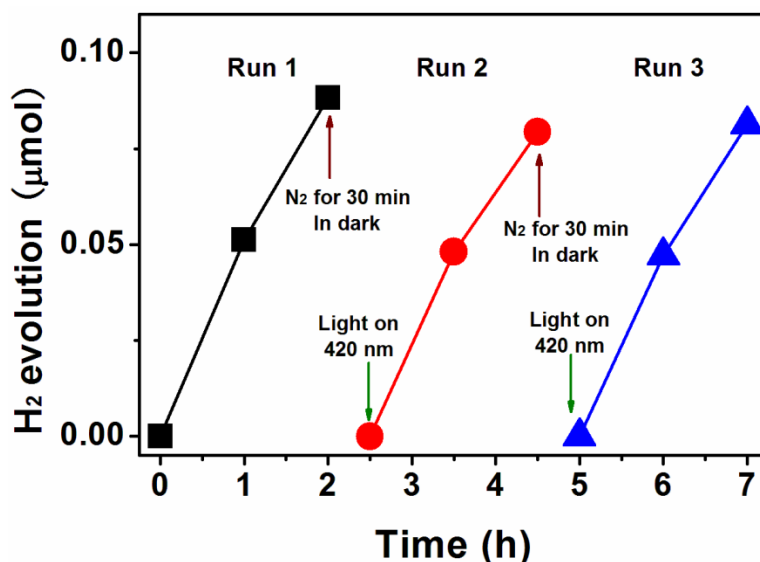

**Figure S6.** Cycling test of photocatalytic H<sub>2</sub> evolution for the Au<sub>0.75</sub>/Pt<sub>0.25</sub>/TiO<sub>2</sub> nanofibers under 420 nm irradiation. It demonstrates that the Au<sub>0.75</sub>/Pt<sub>0.25</sub>/TiO<sub>2</sub> nanofibers have very good stability in the photocatalytic reaction for H<sub>2</sub> generation.

1. Zhang, P.; Shao, C.; Li, X.; Zhang, M.; Zhang, X.; Sun Y.; Liu, Y. In situ assembly of well-dispersed Au nanoparticles on TiO<sub>2</sub>/ZnO nanofibers: A three-way synergistic heterostructure with enhanced photocatalytic activity. *J. Hazard. Mater.* **2013**, *331*, 237-238.
2. Ono, L. K.; Yuan, B.; Heinrich H.; Cuenya, B. R. Formation and Thermal Stability of Platinum Oxides on Size-Selected Platinum Nanoparticles: Support Effects. *J. Phys. Chem. C* **2010**, *114*, 22119-22133.
3. Ding, Y.; Wang, Y.; Zhang, L.; Zhang, H.; Li C. M.; Lei, Y. Preparation of TiO<sub>2</sub>-Pt hybrid nanofibers and their application for sensitive hydrazine detection. *Nanoscale* **2011**, *3*, 1149-1157.
4. Bera, P.; Priolkar, K. R.; Gayen, A.; Sarode, P. R.; Hegde, M. S.; Emura, S.; Kumashiro, R.; Jayaram V.; Subbanna, G. N. Ionic Dispersion of Pt over CeO<sub>2</sub> by the Combustion Method: Structural Investigation by XRD, TEM, XPS, and EXAFS. *Chem. Mater.* **2003**, *15*, 2049-2060.
